# Supplementary material
Source: MDPI journal article supplement (https://www.mdpi.com/2079-6412/9/4/277)

# Solution-Processed Mg-substituted ZnO Thin Films for Metal-Semiconductor-Metal Visible-Blind Photodetectors

Chien-Yie Tsay \*, Shih-Ting Chen and Man-Ting Fan

Department of Materials Science and Engineering, Feng Chia University, Taichung 40724, Taiwan; sarah15937@gmail.com (S.-T.C); wendy5252065@gmail.com (M.-T.F)

\* Correspondence: cytsay@mail.fcu.edu.tw; Tel.: +886-4-2451-7250 (ext. 5312)

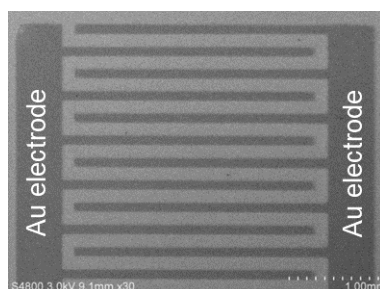

**Figure S1.** Top-view optical microscope (OM) image of the Au interdigitated electrodes (IDEs) of the fabricated photodetector device.

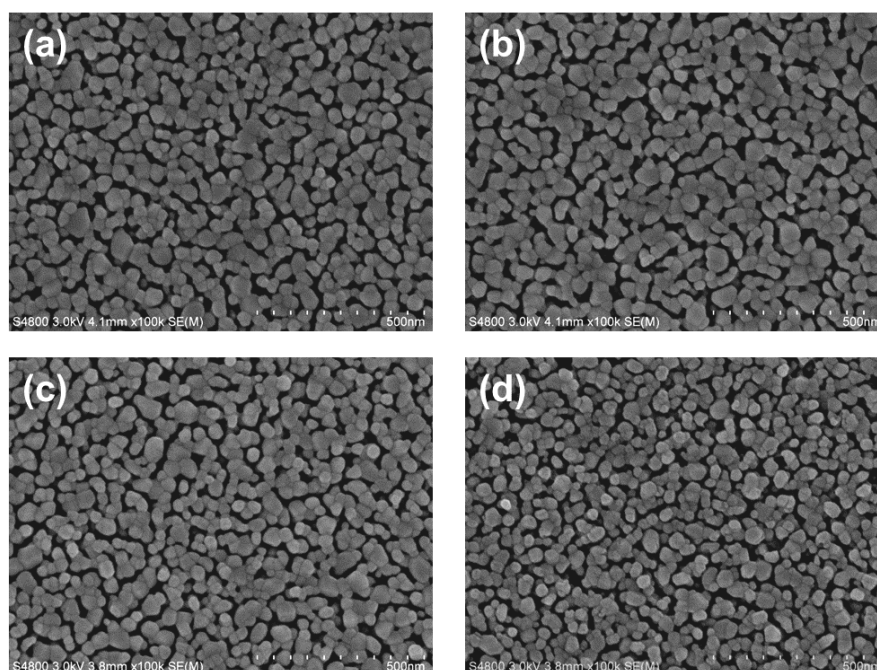

**Figure S2.** Plane-view field-emission scanning electron microscope (FE-SEM) micrographs of  $\text{Mg}_x\text{Zn}_{1-x}\text{O}$  thin films on glass substrates: (a)  $x = 0$ , (b)  $x = 0.1$ , (c)  $x = 0.2$ , and (d)  $x = 0.3$ .

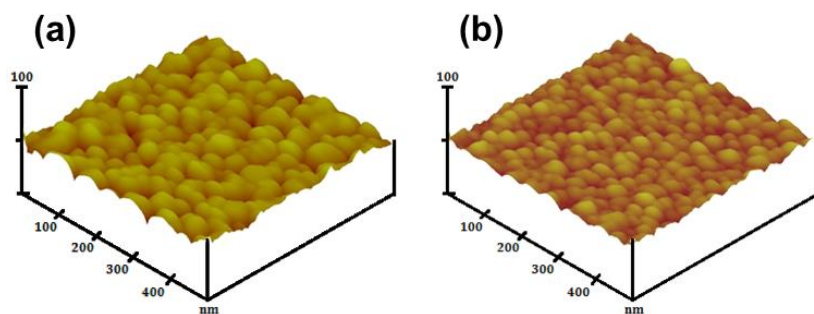

**Figure S3.** Surface scanning probe microscope (SPM) images of  $\text{Mg}_x\text{Zn}_{1-x}\text{O}$  thin films: (a)  $x = 0$  and (b)  $x = 0.2$ .

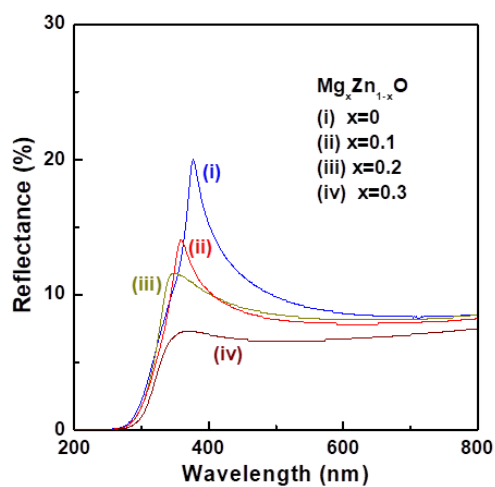

**Figure S4.** Optical reflection spectra of glass/ $\text{Mg}_x\text{Zn}_{1-x}\text{O}$  thin films.

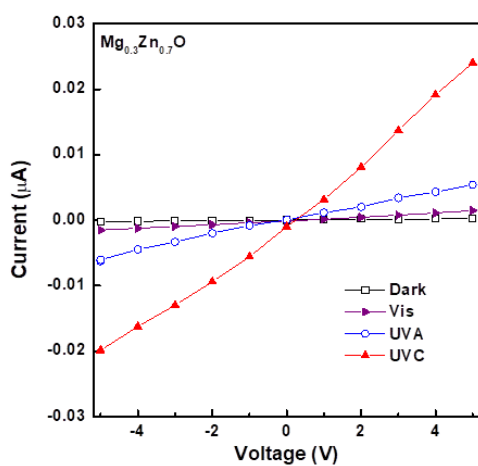

**Figure S5.** Current-voltage ( $I$ - $V$ ) characteristics of  $\text{Mg}_{0.3}\text{Zn}_{0.7}\text{O}$  photodetectors showing dark current and photoilluminated currents under irradiation with visible, UVA and UVC light.

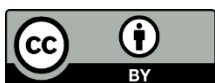

Supplement: s1 [file s1]
